# Supplementary material
Source: publisher figshare collection journal article supplement (https://tandf.figshare.com/articles/dataset/_/11993403)
Supplement: Supplementary file 1 [file 1]

Table S1. Primer sequences for qPCR using in this study.

| Name          | Rap-ID       | Forward sequence (5'-3')  | Reverse sequence (5'-3')  | Reference           |
|---------------|--------------|---------------------------|---------------------------|---------------------|
| <i>UBQ5</i>   | Os01g0328400 | ACCACTTCGACCGCCACTACT     | ACGCCTAAGCCTGCTGGTT       | Fujita et al., 2013 |
| <i>MYBGA</i>  | Os01g0812000 | GCAGGCTGTGGGTTTTGACTATC   | ACTTGTGGGCCTAGAAGCAGAG    | This study          |
| <i>CIPK15</i> | Os11g0113700 | TTTCCAGCAACTCATTAGTGCAGTG | GACTCTGAAAGCGCACTCAATCC   | This study          |
| <i>SnRK1A</i> | Os05g0530500 | TGGAGTCCTAGTTTTCCCAGTCATG | CAGTGTGGGTTGATTTCTCACTGTC | This study          |
| <i>MYBS1</i>  | Os01g0524500 | GATGCCAAGAGTGCAGGGATTG    | GGCCGCTGCTAATTACATCCAC    | This study          |
| <i>Amy3D</i>  | Os08g0473900 | GTAGGCAGGCTCTCTAGCCT      | CCAACGGTTACAAACTGCGTGA    | Hakata et al., 2012 |
| <i>Amy3C</i>  | Os09g0457800 | AGACTTCCATGTCGTTGCTC      | CAGGCACAAAATAGTCCTG       | Hakata et al., 2012 |
| <i>PDC1</i>   | Os05g0469600 | GCAACTGCTGGACAAAGAAG      | AGAAGCTCTTTGCTCGTGTC      | Saika et al., 2006  |
| <i>ADH1</i>   | Os11g0210300 | TCATCCGCATGGAGAACTA       | CCGTATATCATCATTACCC       | Saika et al., 2006  |
| <i>ADH2</i>   | Os11g0210500 | CTCTCTTGCAGTTTCAGTGCAT    | AAGCCATGAAAGGAGGGAGT      | This study          |
| <i>ALDH2a</i> | Os02g0730000 | CAGCTTATCATGGCGGCAAGG     | AGCCTGCTCCAAGGATAGCG      | This study          |
