# Supplementary material
Source: publisher figshare collection journal article supplement (https://tandf.figshare.com/articles/dataset/_/11993403)
Supplement: Supplementary file 2 [file 1]

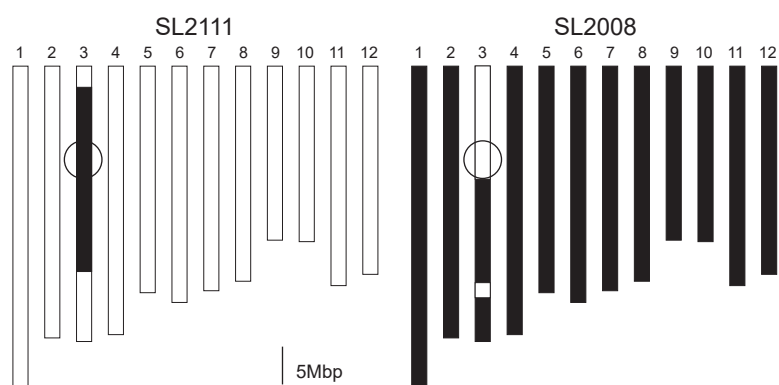

Figure S1 graphical genotype of SL2111 and SL2008.

White and black bars indicate IR 64 and Koshihikari genotype. Circles indicate approximate position for *qACE3.1*.
